# Supplementary material for: One-step solvothermal fabrication of Cu@PANI core–shell nanospheres for hydrogen evolution
Source: Royal Society of Chemistry journal article supplement (doi:10.1039/c8nr06245e), 2018-01-01
Supplement: c8nr06245e1.pdf [file c8nr06245e1.pdf]

## Supporting Information

### One-step solvothermal fabrication of Cu@PANI core-shell nanospheres for hydrogen evolution

Ting Wang<sup>a</sup>, Dan Wu<sup>a</sup>, Youliang Wang<sup>a</sup>, Tingbo Huang<sup>a</sup>, Gary Hstand<sup>b</sup>, Tingting Wang<sup>a,\*</sup>, Heping Zeng<sup>a,\*</sup>

- a. Key Laboratory of Functional Molecular Engineering of Guangdong Province, School of Chemistry and Chemical Engineering, South China University of Technology, Guangzhou, 510641, P. R. China.
- b. International School of Advanced Materials, South China University of Technology, Guangzhou, 510641, P. R. China.

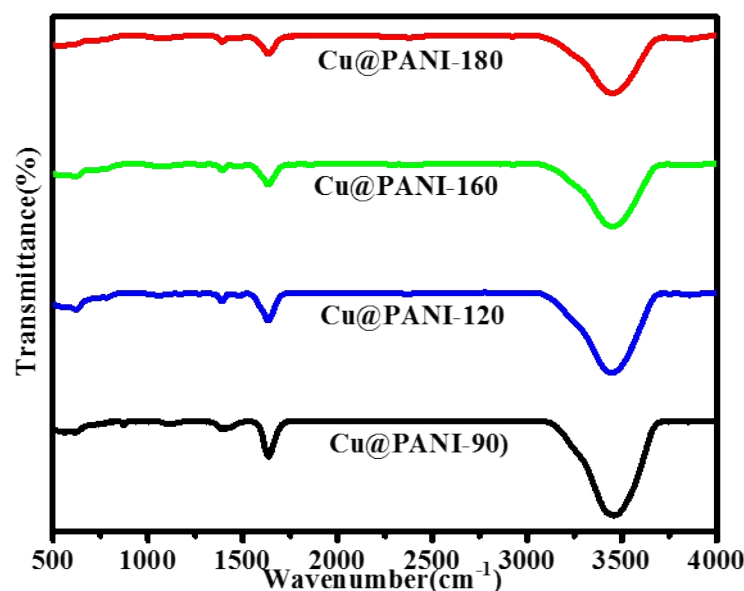

Fig. S1. FTIR spectra of the samples prepared under different temperature

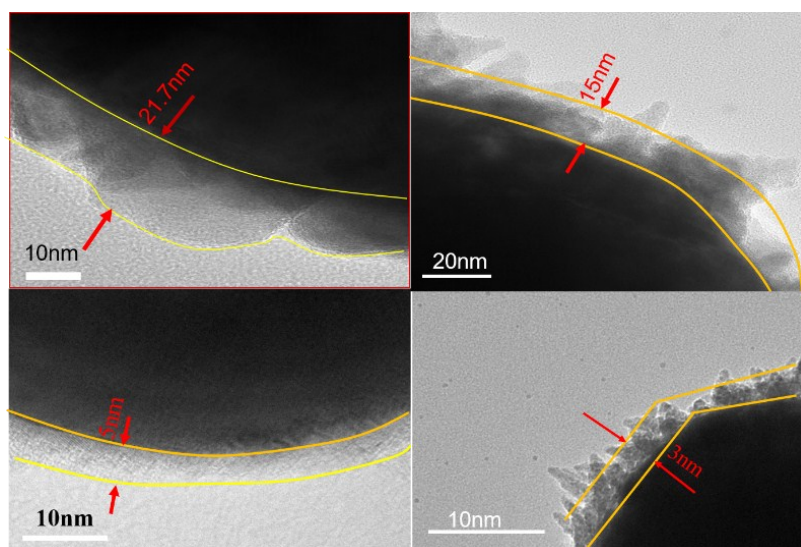

**Fig. S2.** TEM images for: (a)Cu/PANI-90; (b)Cu/PANI-120; (C)Cu/PANI-160; (d)Cu/PANI-180

**Table. S1.** Elemental analysis of Cu/PANI composites

| <div> <div>element content</div> <div>( wt%)</div> </div> <div>sample</div> | N           | C           |
|-----------------------------------------------------------------------------|-------------|-------------|
| <b>Cu/PANI-180</b>                                                          | <b>0.19</b> | <b>1.62</b> |
| <b>Cu/PANI-160</b>                                                          | <b>0.23</b> | <b>1.66</b> |
| <b>Cu/PANI-120</b>                                                          | <b>0.28</b> | <b>1.82</b> |
| <b>Cu/PANI-90</b>                                                           | <b>0.44</b> | <b>1.92</b> |

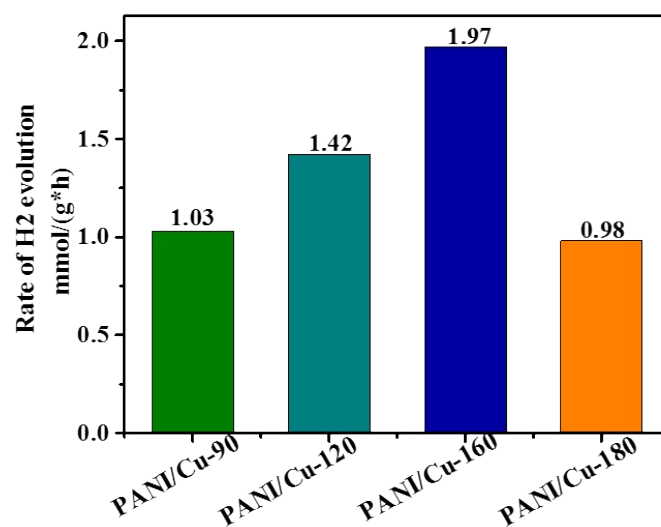

**Fig. S3.** Photocatalytic H<sub>2</sub> evolution of Cu/PANI composites prepared at different temperature under solar light irradiation

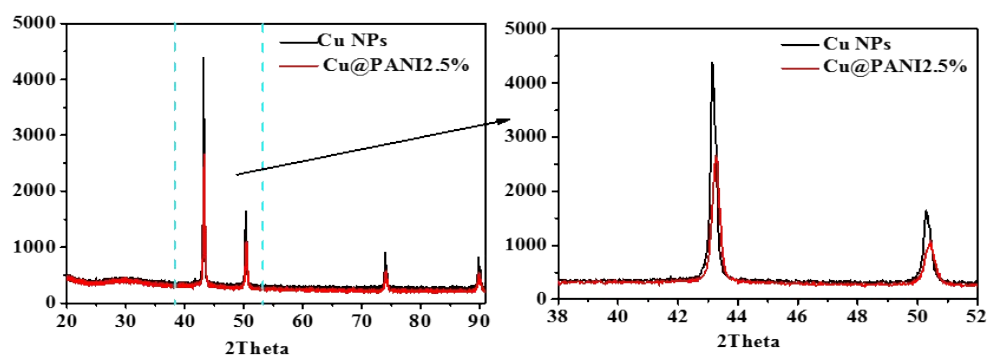

**Fig. S4.** XRD spectra of Cu NPs and Cu@PANI2.5%

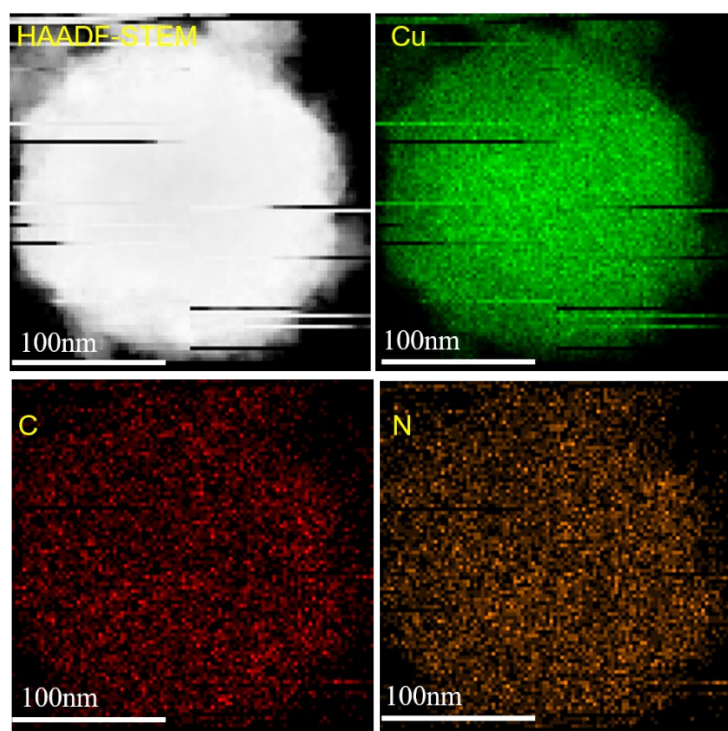

**Fig. S5.** HAADF-STEM and STEM-EDS elemental mapping images of Cu@PANI2.5% core-shell nanospheres

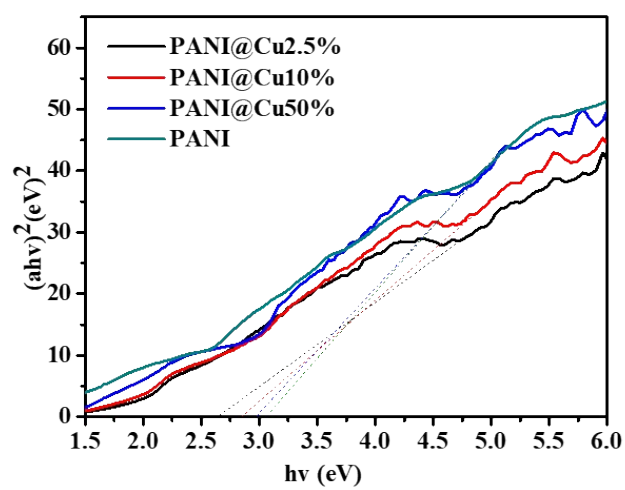

**Fig. S6.** Relationship of  $(ah\nu)^2$  vs.  $E$  (eV) of PANI and Cu@PANI core-shell nanospheres.

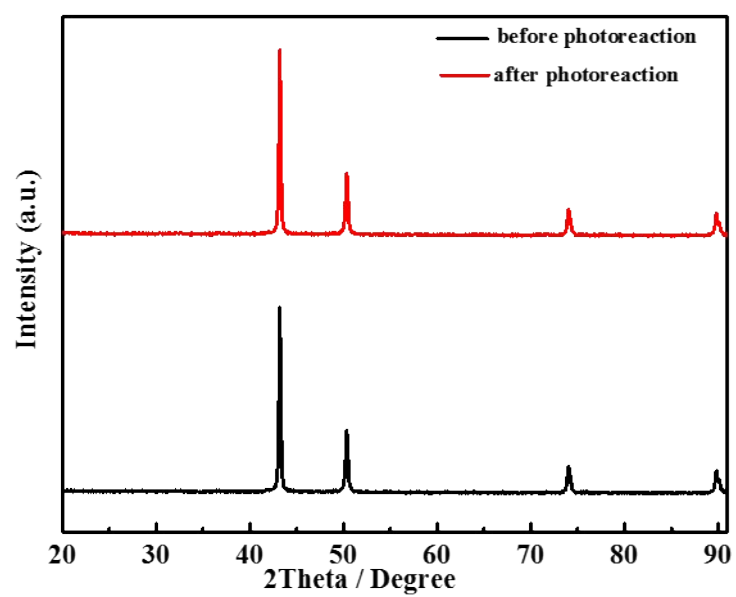

**Fig. S7.** XRD spectra of Cu@PANI2.5%

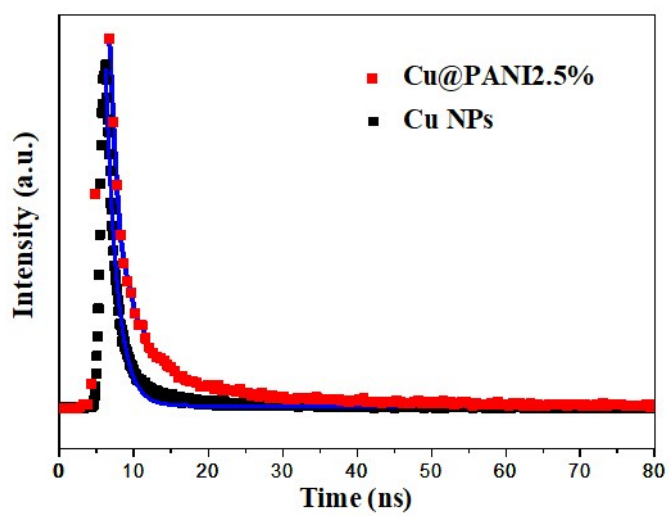

**Fig. S8.** Time-resolved PL decay profiles for Cu NPs and Cu@PANI2.5% core-shell nanospheres

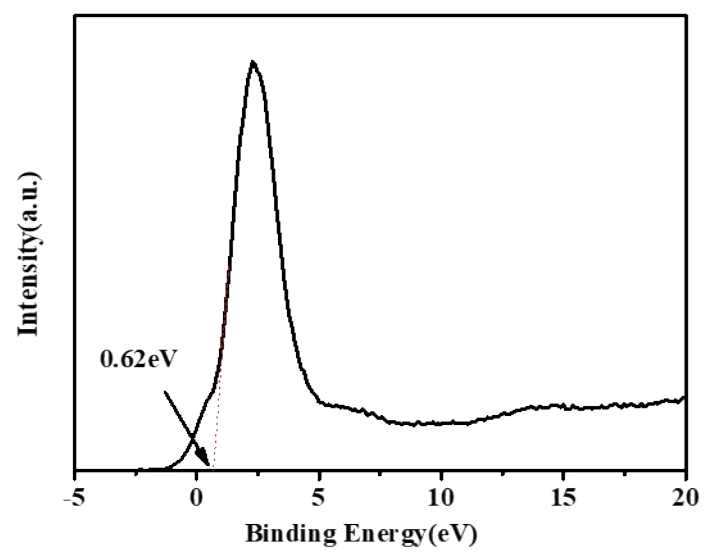

**Fig. S9.** XPS valence band spectra of Cu@PANI2.5%
